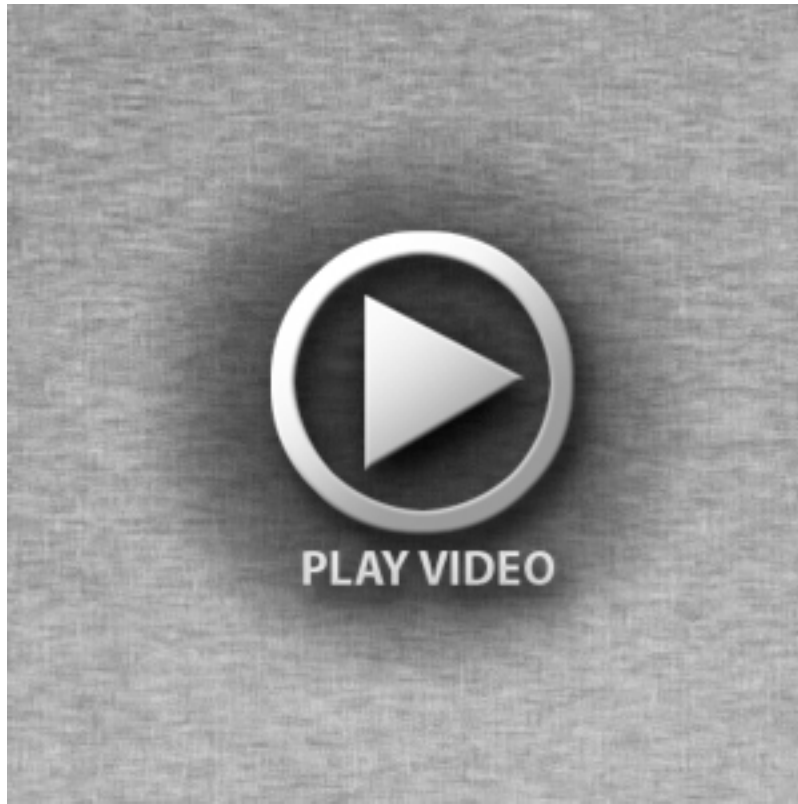

**Movie 1.** Long-term behavior of bioconvection of *Chlamydomonas reinhardtii*, showing the pattern transition response. The same specimen as shown in Fig. 2. Each side of the image is 20 mm. 90 min in real time.

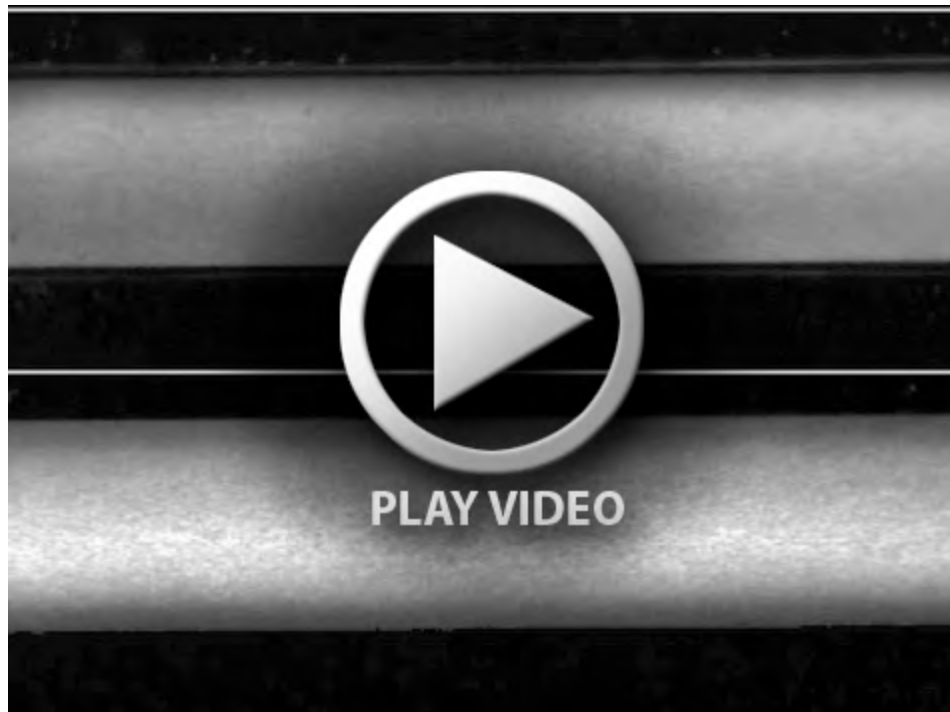

**Movie 2.** Two-axis view of the pattern transition response in the same specimen as shown in Fig. 6. Upper part, side view (vertical observation); lower part, top view (horizontal observation). 40 min in real time.
